# Supplementary material for: 2-Hydroxypropyl-β-Cyclodextrin Accesses Acute and Subacute Infarcts in a Mouse Model of Ischemic Stroke
Source: Research Square preprint supplement (doi:10.21203/rs.3.rs-7521331/v1), 2025-09-12
Supplement: Supplementary file 1 [file afbe57306b8ea1f394502d6e.xlsx]

## Sheet: Sheet1
Figure	Group Sizes (n)	Statistical Test	Statistical Values	P Value	post hoc Statistical Test	post hoc Statistical Comparisons	Adjusted P Value
1B	Stroke Uninjected (24 hr): 5	Ordinary one-way ANOVA	Group: F (3, 16) = 0.4450	0.7242	Tukey's multiple comparisons test	Stroke Uninjected (24 hr) vs. Stroke + FITC-HPβCD (24 hr)	0.7251
	Stroke + FITC-HPβCD (24 hr): 8					Stroke Uninjected (24 hr) vs. Stroke Uninjected (1 wk)	0.9991
	Stroke Uninjected (1 wk): 3					Stroke Uninjected (24 hr) vs. Stroke + FITC-HPβCD (1 wk)	0.9023
	Stroke + FITC-HPβCD (1 wk): 4					Stroke + FITC-HPβCD (24 hr) vs. Stroke Uninjected (1 wk)	0.8815
						Stroke + FITC-HPβCD (24 hr) vs. Stroke + FITC-HPβCD (1 wk)	0.9957
						Stroke Uninjected (1 wk) vs. Stroke + FITC-HPβCD (1 wk)	0.9647
1D	Naïve: 8	RM two-way ANOVA with the Geisser-Greenhouse correction	Time x Group: F (18, 150) = 113.5	<0.0001	Dunnett's multiple comparisons test	Naïve: 0 vs. 5	0.993
	Stroke Uninjected: 8		Time: F (2.742, 68.55) = 320.9	<0.0001		Naïve: 0 vs. 10	0.9128
	Naïve + FITC-HPβCD: 5		Group: F (3, 25) = 175.6	<0.0001		Naïve: 0 vs. 15	0.086
	Stroke + FITC-HPβCD: 8		Mouse: F (25, 150) = 13.74	<0.0001		Naïve: 0 vs. 20	0.9595
						Naïve: 0 vs. 25	0.9995
						Naïve: 0 vs. 30	0.3562
						Stroke Uninjected: 0 vs. 5	0.6801
						Stroke Uninjected: 0 vs. 10	0.7042
						Stroke Uninjected: 0 vs. 15	>0.9999
						Stroke Uninjected: 0 vs. 20	0.9359
						Stroke Uninjected: 0 vs. 25	>0.9999
						Stroke Uninjected: 0 vs. 30	>0.9999
						Naïve + FITC-HPβCD: 0 vs. 5	0.0129
						Naïve + FITC-HPβCD: 0 vs. 10	0.0015
						Naïve + FITC-HPβCD: 0 vs. 15	0.0041
						Naïve + FITC-HPβCD: 0 vs. 20	<0.0001
						Naïve + FITC-HPβCD: 0 vs. 25	<0.0001
						Naïve + FITC-HPβCD: 0 vs. 30	0.0003
						Stroke + FITC-HPβCD: 0 vs. 5	<0.0001
						Stroke + FITC-HPβCD: 0 vs. 10	<0.0001
						Stroke + FITC-HPβCD: 0 vs. 15	<0.0001
						Stroke + FITC-HPβCD: 0 vs. 20	<0.0001
						Stroke + FITC-HPβCD: 0 vs. 25	<0.0001
						Stroke + FITC-HPβCD: 0 vs. 30	<0.0001
2B	Naïve: 7	Ordinary one-way ANOVA	Group: F (3, 21) = 64.19	<0.0001	Tukey's multiple comparisons test	Naïve vs. Stroke Uninjected	0.7983
	Stroke Uninjected: 7					Naïve vs. Naïve + FITC-HPβCD	0.053
	Naïve + FITC-HPβCD: 4					Naïve vs. Stroke + FITC-HPβCD	<0.0001
	Stroke + FITC-HPβCD: 7					Stroke Uninjected vs. Naïve + FITC-HPβCD	0.2269
						Stroke Uninjected vs. Stroke + FITC-HPβCD	<0.0001
						Naïve + FITC-HPβCD vs. Stroke + FITC-HPβCD	<0.0001
2D	Naïve: 8	Ordinary two-way ANOVA	Interaction: F (12, 125) = 31.87	<0.0001	Tukey's multiple comparisons test	Liver: Naïve vs. Stroke Uninjected	0.7695
	Stroke Uninjected: 8		Group: F (3, 125) = 84.96	<0.0001		Liver: Naïve vs. Naïve + FITC-HPβCD	<0.0001
	Naïve + FITC-HPβCD: 5		Organ: F (4, 125) = 178.3	<0.0001		Liver: Naïve vs. Stroke + FITC-HPβCD	<0.0001
	Stroke + FITC-HPβCD: 8					Liver: Stroke Uninjected vs. Naïve + FITC-HPβCD	<0.0001
						Liver: Stroke Uninjected vs. Stroke + FITC-HPβCD	<0.0001
						Liver: Naïve + FITC-HPβCD vs. Stroke + FITC-HPβCD	0.0247
						Kidney: Naïve vs. Stroke Uninjected	0.8515
						Kidney: Naïve vs. Naïve + FITC-HPβCD	0.002
						Kidney: Naïve vs. Stroke + FITC-HPβCD	0.0006
						Kidney: Stroke Uninjected vs. Naïve + FITC-HPβCD	0.0189
						Kidney: Stroke Uninjected vs. Stroke + FITC-HPβCD	0.0089
						Kidney: Naïve + FITC-HPβCD vs. Stroke + FITC-HPβCD	0.9989
						Spleen: Naïve vs. Stroke Uninjected	0.9985
						Spleen: Naïve vs. Naïve + FITC-HPβCD	0.8299
						Spleen: Naïve vs. Stroke + FITC-HPβCD	0.7651
						Spleen: Stroke Uninjected vs. Naïve + FITC-HPβCD	0.8926
						Spleen: Stroke Uninjected vs. Stroke + FITC-HPβCD	0.8482
						Spleen: Naïve + FITC-HPβCD vs. Stroke + FITC-HPβCD	>0.9999
						Heart: Naïve vs. Stroke Uninjected	0.985
						Heart: Naïve vs. Naïve + FITC-HPβCD	0.3321
						Heart: Naïve vs. Stroke + FITC-HPβCD	0.2968
						Heart: Stroke Uninjected vs. Naïve + FITC-HPβCD	0.5121
						Heart: Stroke Uninjected vs. Stroke + FITC-HPβCD	0.4958
						Heart: Naïve + FITC-HPβCD vs. Stroke + FITC-HPβCD	0.9989
						Brain: Naïve vs. Stroke Uninjected	0.9938
						Brain: Naïve vs. Naïve + FITC-HPβCD	0.8145
						Brain: Naïve vs. Stroke + FITC-HPβCD	0.0173
						Brain: Stroke Uninjected vs. Naïve + FITC-HPβCD	0.9143
						Brain: Stroke Uninjected vs. Stroke + FITC-HPβCD	0.0357
						Brain: Naïve + FITC-HPβCD vs. Stroke + FITC-HPβCD	0.3053
3A	Naïve: 8	Ordinary two-way ANOVA	Interaction: F (15, 156) = 20.43	<0.0001	Tukey's multiple comparisons test	Liver: Naïve vs. Stroke Uninjected	>0.9999
	Stroke Uninjected: 5		Group: F (3, 156) = 24.52	<0.0001		Liver: Naïve vs. Naïve + FITC-HPβCD	0.9848
	Naïve + FITC-HPβCD: 9		Organ: F (5, 156) = 59.13	<0.0001		Liver: Naïve vs. Stroke + FITC-HPβCD	0.9833
	Stroke + FITC-HPβCD: 8					Liver: Stroke Uninjected vs. Naïve + FITC-HPβCD	0.9902
						Liver: Stroke Uninjected vs. Stroke + FITC-HPβCD	0.989
						Liver: Naïve + FITC-HPβCD vs. Stroke + FITC-HPβCD	>0.9999
						Kidney: Naïve vs. Stroke Uninjected	>0.9999
						Kidney: Naïve vs. Naïve + FITC-HPβCD	<0.0001
						Kidney: Naïve vs. Stroke + FITC-HPβCD	<0.0001
						Kidney: Stroke Uninjected vs. Naïve + FITC-HPβCD	<0.0001
						Kidney: Stroke Uninjected vs. Stroke + FITC-HPβCD	<0.0001
						Kidney: Naïve + FITC-HPβCD vs. Stroke + FITC-HPβCD	0.6538
						Spleen: Naïve vs. Stroke Uninjected	>0.9999
						Spleen: Naïve vs. Naïve + FITC-HPβCD	0.9891
						Spleen: Naïve vs. Stroke + FITC-HPβCD	0.8649
						Spleen: Stroke Uninjected vs. Naïve + FITC-HPβCD	0.9908
						Spleen: Stroke Uninjected vs. Stroke + FITC-HPβCD	0.8953
						Spleen: Naïve + FITC-HPβCD vs. Stroke + FITC-HPβCD	0.9626
						Heart: Naïve vs. Stroke Uninjected	>0.9999
						Heart: Naïve vs. Naïve + FITC-HPβCD	0.9979
						Heart: Naïve vs. Stroke + FITC-HPβCD	0.9983
						Heart: Stroke Uninjected vs. Naïve + FITC-HPβCD	0.9983
						Heart: Stroke Uninjected vs. Stroke + FITC-HPβCD	0.9986
						Heart: Naïve + FITC-HPβCD vs. Stroke + FITC-HPβCD	>0.9999
						Ipsilateral Brain: Naïve vs. Stroke Uninjected	>0.9999
						Ipsilateral Brain: Naïve vs. Naïve + FITC-HPβCD	>0.9999
						Ipsilateral Brain: Naïve vs. Stroke + FITC-HPβCD	>0.9999
						Ipsilateral Brain: Stroke Uninjected vs. Naïve + FITC-HPβCD	>0.9999
						Ipsilateral Brain: Stroke Uninjected vs. Stroke + FITC-HPβCD	>0.9999
						Ipsilateral Brain: Naïve + FITC-HPβCD vs. Stroke + FITC-HPβCD	>0.9999
						Contralateral Brain: Naïve vs. Stroke Uninjected	>0.9999
						Contralateral Brain: Naïve vs. Naïve + FITC-HPβCD	>0.9999
						Contralateral Brain: Naïve vs. Stroke + FITC-HPβCD	>0.9999
						Contralateral Brain: Stroke Uninjected vs. Naïve + FITC-HPβCD	>0.9999
						Contralateral Brain: Stroke Uninjected vs. Stroke + FITC-HPβCD	>0.9999
						Contralateral Brain: Naïve + FITC-HPβCD vs. Stroke + FITC-HPβCD	>0.9999
3B (Liver)	Naïve: 8	Ordinary one-way ANOVA	Group: F (3, 26) = 18.82	<0.0001	Tukey's multiple comparisons test	Naïve vs. Stroke Uninjected	>0.9999
	Stroke Uninjected: 5					Naïve vs. Naïve + FITC-HPβCD	<0.0001
	Naïve + FITC-HPβCD: 9					Naïve vs. Stroke + FITC-HPβCD	<0.0001
	Stroke + FITC-HPβCD: 8					Stroke Uninjected vs. Naïve + FITC-HPβCD	0.0003
						Stroke Uninjected vs. Stroke + FITC-HPβCD	0.0002
						Naïve + FITC-HPβCD vs. Stroke + FITC-HPβCD	0.9844
3B (Kidney)	Naïve: 8	Ordinary one-way ANOVA	Group: F (3, 26) = 21.16	<0.0001	Tukey's multiple comparisons test	Naïve vs. Stroke Uninjected	>0.9999
	Stroke Uninjected: 5					Naïve vs. Naïve + FITC-HPβCD	<0.0001
	Naïve + FITC-HPβCD: 9					Naïve vs. Stroke + FITC-HPβCD	<0.0001
	Stroke + FITC-HPβCD: 8					Stroke Uninjected vs. Naïve + FITC-HPβCD	0.0002
						Stroke Uninjected vs. Stroke + FITC-HPβCD	<0.0001
						Naïve + FITC-HPβCD vs. Stroke + FITC-HPβCD	0.9641
3B (Spleen)	Naïve: 8	Ordinary one-way ANOVA	Group: F (3, 26) = 10.50	0.0001	Tukey's multiple comparisons test	Naïve vs. Stroke Uninjected	0.9988
	Stroke Uninjected: 5					Naïve vs. Naïve + FITC-HPβCD	0.2067
	Naïve + FITC-HPβCD: 9					Naïve vs. Stroke + FITC-HPβCD	0.0002
	Stroke + FITC-HPβCD: 8					Stroke Uninjected vs. Naïve + FITC-HPβCD	0.2486
						Stroke Uninjected vs. Stroke + FITC-HPβCD	0.0007
						Naïve + FITC-HPβCD vs. Stroke + FITC-HPβCD	0.0224
3B (Heart)	Naïve: 8	Ordinary one-way ANOVA	Group: F (3, 26) = 10.96	<0.0001	Tukey's multiple comparisons test	Naïve vs. Stroke Uninjected	0.995
	Stroke Uninjected: 5					Naïve vs. Naïve + FITC-HPβCD	0.0011
	Naïve + FITC-HPβCD: 9					Naïve vs. Stroke + FITC-HPβCD	0.0024
	Stroke + FITC-HPβCD: 8					Stroke Uninjected vs. Naïve + FITC-HPβCD	0.0024
						Stroke Uninjected vs. Stroke + FITC-HPβCD	0.0045
						Naïve + FITC-HPβCD vs. Stroke + FITC-HPβCD	0.9978
3C	Naïve Contralateral: 8	Ordinary one-way ANOVA	Group: F (7, 52) = 12.00	<0.0001	Tukey's multiple comparisons test	Naïve Contralateral vs. Naïve Ipsilateral	0.9998
	Naïve Ipsilateral: 8					Naïve Contralateral vs. Stroke Uninjected Contralateral	>0.9999
	Stroke Uninjected Contralateral: 5					Naïve Contralateral vs. Stroke Uninjected Ipsilateral	0.9998
	Stroke Uninjected Ipsilateral: 5					Naïve Contralateral vs. Naïve + FITC-HPβCD Contralateral	0.1434
	Naïve + FITC-HPβCD Contralateral: 9					Naïve Contralateral vs. Naïve + FITC-HPβCD Ipsilateral	0.0403
	Naïve + FITC-HPβCD Ipsilateral: 9					Naïve Contralateral vs. Stroke + FITC-HPβCD Contralateral	0.0237
	Stroke + FITC-HPβCD Contralateral: 8					Naïve Contralateral vs. Stroke + FITC-HPβCD Ipsilateral	<0.0001
	Stroke + FITC-HPβCD Ipsilateral: 8					Naïve Ipsilateral vs. Stroke Uninjected Contralateral	>0.9999
						Naïve Ipsilateral vs. Stroke Uninjected Ipsilateral	>0.9999
						Naïve Ipsilateral vs. Naïve + FITC-HPβCD Contralateral	0.3351
						Naïve Ipsilateral vs. Naïve + FITC-HPβCD Ipsilateral	0.1188
						Naïve Ipsilateral vs. Stroke + FITC-HPβCD Contralateral	0.073
						Naïve Ipsilateral vs. Stroke + FITC-HPβCD Ipsilateral	<0.0001
						Stroke Uninjected Contralateral vs. Stroke Uninjected Ipsilateral	>0.9999
						Stroke Uninjected Contralateral vs. Naïve + FITC-HPβCD Contralateral	0.4959
						Stroke Uninjected Contralateral vs. Naïve + FITC-HPβCD Ipsilateral	0.2359
						Stroke Uninjected Contralateral vs. Stroke + FITC-HPβCD Contralateral	0.1586
						Stroke Uninjected Contralateral vs. Stroke + FITC-HPβCD Ipsilateral	<0.0001
						Stroke Uninjected Ipsilateral vs. Naïve + FITC-HPβCD Contralateral	0.56
						Stroke Uninjected Ipsilateral vs. Naïve + FITC-HPβCD Ipsilateral	0.2819
						Stroke Uninjected Ipsilateral vs. Stroke + FITC-HPβCD Contralateral	0.1927
						Stroke Uninjected Ipsilateral vs. Stroke + FITC-HPβCD Ipsilateral	<0.0001
						Naïve + FITC-HPβCD Contralateral vs. Naïve + FITC-HPβCD Ipsilateral	0.9993
						Naïve + FITC-HPβCD Contralateral vs. Stroke + FITC-HPβCD Contralateral	0.9904
						Naïve + FITC-HPβCD Contralateral vs. Stroke + FITC-HPβCD Ipsilateral	0.0002
						Naïve + FITC-HPβCD Ipsilateral vs. Stroke + FITC-HPβCD Contralateral	>0.9999
						Naïve + FITC-HPβCD Ipsilateral vs. Stroke + FITC-HPβCD Ipsilateral	0.0011
						Stroke + FITC-HPβCD Contralateral vs. Stroke + FITC-HPβCD Ipsilateral	0.004
3D	Naïve: 7	Ordinary one-way ANOVA	Group: F (7, 52) = 54.67	<0.0001	Tukey's multiple comparisons test	Naïve vs. Stroke Uninjected	>0.9999
	Stroke Uninjected: 3					Naïve vs. Naïve + FITC-HPβCD 1 min	0.7796
	Naïve + FITC-HPβCD 1 min: 9					Naïve vs. Naïve + FITC-HPβCD 15 min	<0.0001
	Naïve + FITC-HPβCD 15 min: 9					Naïve vs. Naïve + FITC-HPβCD 30 min	<0.0001
	Naïve + FITC-HPβCD 30 min: 9					Naïve vs. Stroke + FITC-HPβCD 1 min	0.2734
	Stroke + FITC-HPβCD 1 min: 8					Naïve vs. Stroke + FITC-HPβCD 15 min	<0.0001
	Stroke + FITC-HPβCD 15 min: 7					Naïve vs. Stroke + FITC-HPβCD 30 min	<0.0001
	Stroke + FITC-HPβCD 30 min: 8					Stroke Uninjected vs. Naïve + FITC-HPβCD 1 min	0.9365
						Stroke Uninjected vs. Naïve + FITC-HPβCD 15 min	0.0005
						Stroke Uninjected vs. Naïve + FITC-HPβCD 30 min	<0.0001
						Stroke Uninjected vs. Stroke + FITC-HPβCD 1 min	0.6087
						Stroke Uninjected vs. Stroke + FITC-HPβCD 15 min	<0.0001
						Stroke Uninjected vs. Stroke + FITC-HPβCD 30 min	<0.0001
						Naïve + FITC-HPβCD 1 min vs. Naïve + FITC-HPβCD 15 min	0.0002
						Naïve + FITC-HPβCD 1 min vs. Naïve + FITC-HPβCD 30 min	<0.0001
						Naïve + FITC-HPβCD 1 min vs. Stroke + FITC-HPβCD 1 min	0.9815
						Naïve + FITC-HPβCD 1 min vs. Stroke + FITC-HPβCD 15 min	<0.0001
						Naïve + FITC-HPβCD 1 min vs. Stroke + FITC-HPβCD 30 min	<0.0001
						Naïve + FITC-HPβCD 15 min vs. Naïve + FITC-HPβCD 30 min	<0.0001
						Naïve + FITC-HPβCD 15 min vs. Stroke + FITC-HPβCD 1 min	0.006
						Naïve + FITC-HPβCD 15 min vs. Stroke + FITC-HPβCD 15 min	0.2467
						Naïve + FITC-HPβCD 15 min vs. Stroke + FITC-HPβCD 30 min	<0.0001
						Naïve + FITC-HPβCD 30 min vs. Stroke + FITC-HPβCD 1 min	<0.0001
						Naïve + FITC-HPβCD 30 min vs. Stroke + FITC-HPβCD 15 min	0.1393
						Naïve + FITC-HPβCD 30 min vs. Stroke + FITC-HPβCD 30 min	0.0604
						Stroke + FITC-HPβCD 1 min vs. Stroke + FITC-HPβCD 15 min	<0.0001
						Stroke + FITC-HPβCD 1 min vs. Stroke + FITC-HPβCD 30 min	<0.0001
						Stroke + FITC-HPβCD 15 min vs. Stroke + FITC-HPβCD 30 min	<0.0001
4B	Naïve: 4	RM two-way ANOVA with the Geisser-Greenhouse correction	Time x Group: F (18, 72) = 54.60	<0.0001	Dunnett's multiple comparisons test	Naïve: 0 vs. 5	0.8966
	Stroke Uninjected: 4		Time: F (1.798, 21.58) = 154.5	<0.0001		Naïve: 0 vs. 10	0.0605
	Naïve + FITC-HPβCD: 4		Group: F (3, 12) = 116.2	<0.0001		Naïve: 0 vs. 15	0.1252
	Stroke + FITC-HPβCD: 4		Mouse: F (12, 72) = 11.07	<0.0001		Naïve: 0 vs. 20	0.7891
						Naïve: 0 vs. 25	0.6344
						Naïve: 0 vs. 30	0.5056
						Stroke Uninjected: 0 vs. 5	0.984
						Stroke Uninjected: 0 vs. 10	0.3911
						Stroke Uninjected: 0 vs. 15	0.999
						Stroke Uninjected: 0 vs. 20	0.8747
						Stroke Uninjected: 0 vs. 25	0.7819
						Stroke Uninjected: 0 vs. 30	0.9853
						Naïve + FITC-HPβCD: 0 vs. 5	0.0117
						Naïve + FITC-HPβCD: 0 vs. 10	0.0099
						Naïve + FITC-HPβCD: 0 vs. 15	0.0034
						Naïve + FITC-HPβCD: 0 vs. 20	<0.0001
						Naïve + FITC-HPβCD: 0 vs. 25	0.0025
						Naïve + FITC-HPβCD: 0 vs. 30	0.0003
						Stroke + FITC-HPβCD: 0 vs. 5	0.0633
						Stroke + FITC-HPβCD: 0 vs. 10	0.0301
						Stroke + FITC-HPβCD: 0 vs. 15	0.0061
						Stroke + FITC-HPβCD: 0 vs. 20	0.0027
						Stroke + FITC-HPβCD: 0 vs. 25	0.0003
						Stroke + FITC-HPβCD: 0 vs. 30	0.0009
5B	Naïve: 4	Ordinary one-way ANOVA	Group: F (3, 12) = 12.44	0.0005	Tukey's multiple comparisons test	Naïve vs. Stroke Uninjected	0.4514
	Stroke Uninjected: 4					Naïve vs. Naïve + FITC-HPβCD	0.7784
	Naïve + FITC-HPβCD: 4					Naïve vs. Stroke + FITC-HPβCD	0.0005
	Stroke + FITC-HPβCD: 4					Stroke Uninjected vs. Naïve + FITC-HPβCD	0.9368
						Stroke Uninjected vs. Stroke + FITC-HPβCD	0.0067
						Naïve + FITC-HPβCD vs. Stroke + FITC-HPβCD	0.0025
5D	Naïve: 4	Ordinary two-way ANOVA	Interaction: F (12, 60) = 106.7	<0.0001	Tukey's multiple comparisons test	Liver: Naïve vs. Stroke Uninjected	0.9995
	Stroke Uninjected: 4		Group: F (3, 60) = 326.3	<0.0001		Liver: Naïve vs. Naïve + FITC-HPβCD	<0.0001
	Naïve + FITC-HPβCD: 4		Organ: F (4, 60) = 652.4	<0.0001		Liver: Naïve vs. Stroke + FITC-HPβCD	<0.0001
	Stroke + FITC-HPβCD: 4					Liver: Stroke Uninjected vs. Naïve + FITC-HPβCD	<0.0001
						Liver: Stroke Uninjected vs. Stroke + FITC-HPβCD	<0.0001
						Liver: Naïve + FITC-HPβCD vs. Stroke + FITC-HPβCD	<0.0001
						Spleen: Naïve vs. Stroke Uninjected	0.9945
						Spleen: Naïve vs. Naïve + FITC-HPβCD	0.4291
						Spleen: Naïve vs. Stroke + FITC-HPβCD	0.045
						Spleen: Stroke Uninjected vs. Naïve + FITC-HPβCD	0.5821
						Spleen: Stroke Uninjected vs. Stroke + FITC-HPβCD	0.0812
						Spleen: Naïve + FITC-HPβCD vs. Stroke + FITC-HPβCD	0.6537
						Kidney: Naïve vs. Stroke Uninjected	0.9999
						Kidney: Naïve vs. Naïve + FITC-HPβCD	<0.0001
						Kidney: Naïve vs. Stroke + FITC-HPβCD	<0.0001
						Kidney: Stroke Uninjected vs. Naïve + FITC-HPβCD	<0.0001
						Kidney: Stroke Uninjected vs. Stroke + FITC-HPβCD	<0.0001
						Kidney: Naïve + FITC-HPβCD vs. Stroke + FITC-HPβCD	0.5501
						Heart: Naïve vs. Stroke Uninjected	>0.9999
						Heart: Naïve vs. Naïve + FITC-HPβCD	0.0142
						Heart: Naïve vs. Stroke + FITC-HPβCD	0.0056
						Heart: Stroke Uninjected vs. Naïve + FITC-HPβCD	0.0119
						Heart: Stroke Uninjected vs. Stroke + FITC-HPβCD	0.0046
						Heart: Naïve + FITC-HPβCD vs. Stroke + FITC-HPβCD	0.9881
						Brain: Naïve vs. Stroke Uninjected	0.1918
						Brain: Naïve vs. Naïve + FITC-HPβCD	0.6388
						Brain: Naïve vs. Stroke + FITC-HPβCD	<0.0001
						Brain: Stroke Uninjected vs. Naïve + FITC-HPβCD	0.837
						Brain: Stroke Uninjected vs. Stroke + FITC-HPβCD	<0.0001
						Brain: Naïve + FITC-HPβCD vs. Stroke + FITC-HPβCD	<0.0001
6A	Naïve: 8	Ordinary two-way ANOVA	Interaction: F (15, 120) = 11.04	<0.0001	Tukey's multiple comparisons test	Liver: Naïve vs. Stroke Uninjected	>0.9999
	Stroke Uninjected: 3		Group: F (3, 120) = 12.84	<0.0001		Liver: Naïve vs. Naïve + FITC-HPβCD	0.9912
	Naïve + FITC-HPβCD: 9		Organ: F (5, 120) = 27.75	<0.0001		Liver: Naïve vs. Stroke + FITC-HPβCD	0.9973
	Stroke + FITC-HPβCD: 4					Liver: Stroke Uninjected vs. Naïve + FITC-HPβCD	0.9965
						Liver: Stroke Uninjected vs. Stroke + FITC-HPβCD	0.9986
						Liver: Naïve + FITC-HPβCD vs. Stroke + FITC-HPβCD	>0.9999
						Spleen: Naïve vs. Stroke Uninjected	>0.9999
						Spleen: Naïve vs. Naïve + FITC-HPβCD	0.9937
						Spleen: Naïve vs. Stroke + FITC-HPβCD	0.9945
						Spleen: Stroke Uninjected vs. Naïve + FITC-HPβCD	0.9963
						Spleen: Stroke Uninjected vs. Stroke + FITC-HPβCD	0.9959
						Spleen: Naïve + FITC-HPβCD vs. Stroke + FITC-HPβCD	>0.9999
						Kidney: Naïve vs. Stroke Uninjected	>0.9999
						Kidney: Naïve vs. Naïve + FITC-HPβCD	<0.0001
						Kidney: Naïve vs. Stroke + FITC-HPβCD	<0.0001
						Kidney: Stroke Uninjected vs. Naïve + FITC-HPβCD	<0.0001
						Kidney: Stroke Uninjected vs. Stroke + FITC-HPβCD	<0.0001
						Kidney: Naïve + FITC-HPβCD vs. Stroke + FITC-HPβCD	0.8976
						Heart: Naïve vs. Stroke Uninjected	>0.9999
						Heart: Naïve vs. Naïve + FITC-HPβCD	0.9988
						Heart: Naïve vs. Stroke + FITC-HPβCD	0.9988
						Heart: Stroke Uninjected vs. Naïve + FITC-HPβCD	0.9992
						Heart: Stroke Uninjected vs. Stroke + FITC-HPβCD	0.999
						Heart: Naïve + FITC-HPβCD vs. Stroke + FITC-HPβCD	>0.9999
						Ipsilateral Brain: Naïve vs. Stroke Uninjected	>0.9999
						Ipsilateral Brain: Naïve vs. Naïve + FITC-HPβCD	>0.9999
						Ipsilateral Brain: Naïve vs. Stroke + FITC-HPβCD	>0.9999
						Ipsilateral Brain: Stroke Uninjected vs. Naïve + FITC-HPβCD	>0.9999
						Ipsilateral Brain: Stroke Uninjected vs. Stroke + FITC-HPβCD	>0.9999
						Ipsilateral Brain: Naïve + FITC-HPβCD vs. Stroke + FITC-HPβCD	>0.9999
						Contralateral Brain: Naïve vs. Stroke Uninjected	>0.9999
						Contralateral Brain: Naïve vs. Naïve + FITC-HPβCD	>0.9999
						Contralateral Brain: Naïve vs. Stroke + FITC-HPβCD	>0.9999
						Contralateral Brain: Stroke Uninjected vs. Naïve + FITC-HPβCD	>0.9999
						Contralateral Brain: Stroke Uninjected vs. Stroke + FITC-HPβCD	>0.9999
						Contralateral Brain: Naïve + FITC-HPβCD vs. Stroke + FITC-HPβCD	>0.9999
6B (Liver)	Naïve: 8	Ordinary one-way ANOVA	Group: F (3, 20) = 13.10	<0.0001	Tukey's multiple comparisons test	Naïve vs. Stroke Uninjected	>0.9999
	Stroke Uninjected: 3					Naïve vs. Naïve + FITC-HPβCD	0.0001
	Naïve + FITC-HPβCD: 9					Naïve vs. Stroke + FITC-HPβCD	0.007
	Stroke + FITC-HPβCD: 4					Stroke Uninjected vs. Naïve + FITC-HPβCD	0.0034
						Stroke Uninjected vs. Stroke + FITC-HPβCD	0.0346
						Naïve + FITC-HPβCD vs. Stroke + FITC-HPβCD	0.9035
6B (Spleen)	Naïve: 8	Ordinary one-way ANOVA	Group: F (3, 20) = 16.50	<0.0001	Tukey's multiple comparisons test	Naïve vs. Stroke Uninjected	0.9392
	Stroke Uninjected: 3					Naïve vs. Naïve + FITC-HPβCD	0.0002
	Naïve + FITC-HPβCD: 9					Naïve vs. Stroke + FITC-HPβCD	0.0003
	Stroke + FITC-HPβCD: 4					Stroke Uninjected vs. Naïve + FITC-HPβCD	0.0013
						Stroke Uninjected vs. Stroke + FITC-HPβCD	0.001
						Naïve + FITC-HPβCD vs. Stroke + FITC-HPβCD	0.8104
6B (Kidney)	Naïve: 8	Ordinary one-way ANOVA	Group: F (3, 20) = 11.33	0.0001	Tukey's multiple comparisons test	Naïve vs. Stroke Uninjected	>0.9999
	Stroke Uninjected: 3					Naïve vs. Naïve + FITC-HPβCD	0.0006
	Naïve + FITC-HPβCD: 9					Naïve vs. Stroke + FITC-HPβCD	0.0029
	Stroke + FITC-HPβCD: 4					Stroke Uninjected vs. Naïve + FITC-HPβCD	0.0111
						Stroke Uninjected vs. Stroke + FITC-HPβCD	0.018
						Naïve + FITC-HPβCD vs. Stroke + FITC-HPβCD	0.9917
6B (Heart)	Naïve: 8	Ordinary one-way ANOVA	Group: F (3, 20) = 14.95	<0.0001	Tukey's multiple comparisons test	Naïve vs. Stroke Uninjected	0.9036
	Stroke Uninjected: 3					Naïve vs. Naïve + FITC-HPβCD	0.0005
	Naïve + FITC-HPβCD: 9					Naïve vs. Stroke + FITC-HPβCD	0.0005
	Stroke + FITC-HPβCD: 4					Stroke Uninjected vs. Naïve + FITC-HPβCD	0.002
						Stroke Uninjected vs. Stroke + FITC-HPβCD	0.0011
						Naïve + FITC-HPβCD vs. Stroke + FITC-HPβCD	0.722
6C	Naïve Contralateral: 8	Ordinary one-way ANOVA	Group: F (7, 40) = 18.61	<0.0001	Tukey's multiple comparisons test	Naïve Contralateral vs. Naïve Ipsilateral	0.9998
	Naïve Ipsilateral: 8					Naïve Contralateral vs. Stroke Uninjected Contralateral	>0.9999
	Stroke Uninjected Contralateral: 3					Naïve Contralateral vs. Stroke Uninjected Ipsilateral	>0.9999
	Stroke Uninjected Ipsilateral: 3					Naïve Contralateral vs. Naïve + FITC-HPβCD Contralateral	0.1335
	Naïve + FITC-HPβCD Contralateral: 9					Naïve Contralateral vs. Naïve + FITC-HPβCD Ipsilateral	0.0379
	Naïve + FITC-HPβCD Ipsilateral: 9					Naïve Contralateral vs. Stroke + FITC-HPβCD Contralateral	0.0377
	Stroke + FITC-HPβCD Contralateral: 4					Naïve Contralateral vs. Stroke + FITC-HPβCD Ipsilateral	<0.0001
	Stroke + FITC-HPβCD Ipsilateral: 4					Naïve Ipsilateral vs. Stroke Uninjected Contralateral	>0.9999
						Naïve Ipsilateral vs. Stroke Uninjected Ipsilateral	>0.9999
						Naïve Ipsilateral vs. Naïve + FITC-HPβCD Contralateral	0.3153
						Naïve Ipsilateral vs. Naïve + FITC-HPβCD Ipsilateral	0.1106
						Naïve Ipsilateral vs. Stroke + FITC-HPβCD Contralateral	0.0894
						Naïve Ipsilateral vs. Stroke + FITC-HPβCD Ipsilateral	<0.0001
						Stroke Uninjected Contralateral vs. Stroke Uninjected Ipsilateral	>0.9999
						Stroke Uninjected Contralateral vs. Naïve + FITC-HPβCD Contralateral	0.5272
						Stroke Uninjected Contralateral vs. Naïve + FITC-HPβCD Ipsilateral	0.2949
						Stroke Uninjected Contralateral vs. Stroke + FITC-HPβCD Contralateral	0.1868
						Stroke Uninjected Contralateral vs. Stroke + FITC-HPβCD Ipsilateral	<0.0001
						Stroke Uninjected Ipsilateral vs. Naïve + FITC-HPβCD Contralateral	0.5964
						Stroke Uninjected Ipsilateral vs. Naïve + FITC-HPβCD Ipsilateral	0.351
						Stroke Uninjected Ipsilateral vs. Stroke + FITC-HPβCD Contralateral	0.223
						Stroke Uninjected Ipsilateral vs. Stroke + FITC-HPβCD Ipsilateral	<0.0001
						Naïve + FITC-HPβCD Contralateral vs. Naïve + FITC-HPβCD Ipsilateral	0.9991
						Naïve + FITC-HPβCD Contralateral vs. Stroke + FITC-HPβCD Contralateral	0.9438
						Naïve + FITC-HPβCD Contralateral vs. Stroke + FITC-HPβCD Ipsilateral	<0.0001
						Naïve + FITC-HPβCD Ipsilateral vs. Stroke + FITC-HPβCD Contralateral	0.9966
						Naïve + FITC-HPβCD Ipsilateral vs. Stroke + FITC-HPβCD Ipsilateral	<0.0001
						Stroke + FITC-HPβCD Contralateral vs. Stroke + FITC-HPβCD Ipsilateral	<0.0001
6D	Naïve: 7	Ordinary one-way ANOVA	Group: F (7, 41) = 25.13	<0.0001	Tukey's multiple comparisons test	Naïve vs. Stroke Uninjected	>0.9999
	Stroke Uninjected: 3					Naïve vs. Naïve + FITC-HPβCD 1 min	0.9034
	Naïve + FITC-HPβCD 1 min: 9					Naïve vs. Naïve + FITC-HPβCD 15 min	0.0002
	Naïve + FITC-HPβCD 15 min: 9					Naïve vs. Naïve + FITC-HPβCD 30 min	<0.0001
	Naïve + FITC-HPβCD 30 min: 9					Naïve vs. Stroke + FITC-HPβCD 1 min	0.3157
	Stroke + FITC-HPβCD 1 min: 4					Naïve vs. Stroke + FITC-HPβCD 15 min	0.0001
	Stroke + FITC-HPβCD 15 min: 4					Naïve vs. Stroke + FITC-HPβCD 30 min	<0.0001
	Stroke + FITC-HPβCD 30 min: 4					Stroke Uninjected vs. Naïve + FITC-HPβCD 1 min	0.9769
						Stroke Uninjected vs. Naïve + FITC-HPβCD 15 min	0.0082
						Stroke Uninjected vs. Naïve + FITC-HPβCD 30 min	<0.0001
						Stroke Uninjected vs. Stroke + FITC-HPβCD 1 min	0.563
						Stroke Uninjected vs. Stroke + FITC-HPβCD 15 min	0.0025
						Stroke Uninjected vs. Stroke + FITC-HPβCD 30 min	<0.0001
						Naïve + FITC-HPβCD 1 min vs. Naïve + FITC-HPβCD 15 min	0.0041
						Naïve + FITC-HPβCD 1 min vs. Naïve + FITC-HPβCD 30 min	<0.0001
						Naïve + FITC-HPβCD 1 min vs. Stroke + FITC-HPβCD 1 min	0.8795
						Naïve + FITC-HPβCD 1 min vs. Stroke + FITC-HPβCD 15 min	0.0019
						Naïve + FITC-HPβCD 1 min vs. Stroke + FITC-HPβCD 30 min	<0.0001
						Naïve + FITC-HPβCD 15 min vs. Naïve + FITC-HPβCD 30 min	0.0012
						Naïve + FITC-HPβCD 15 min vs. Stroke + FITC-HPβCD 1 min	0.5616
						Naïve + FITC-HPβCD 15 min vs. Stroke + FITC-HPβCD 15 min	0.9415
						Naïve + FITC-HPβCD 15 min vs. Stroke + FITC-HPβCD 30 min	0.0008
						Naïve + FITC-HPβCD 30 min vs. Stroke + FITC-HPβCD 1 min	<0.0001
						Naïve + FITC-HPβCD 30 min vs. Stroke + FITC-HPβCD 15 min	0.2615
						Naïve + FITC-HPβCD 30 min vs. Stroke + FITC-HPβCD 30 min	0.9566
						Stroke + FITC-HPβCD 1 min vs. Stroke + FITC-HPβCD 15 min	0.19
						Stroke + FITC-HPβCD 1 min vs. Stroke + FITC-HPβCD 30 min	<0.0001
						Stroke + FITC-HPβCD 15 min vs. Stroke + FITC-HPβCD 30 min	0.0838
